# Supplementary material
Source: MDPI journal article supplement (https://www.mdpi.com/1999-4907/11/12/1300)

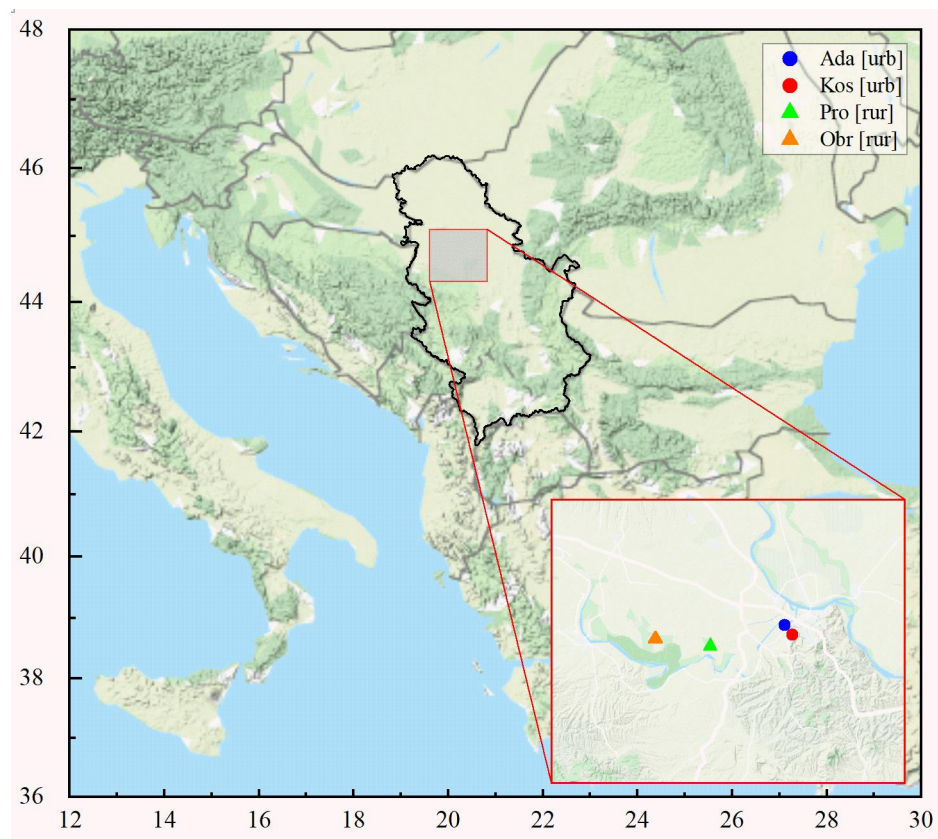

**Figure S1.** Map of the investigated localities.

Supplement: s1 [file s1]
